# Supplementary material for: 3D whole-heart isotropic sub-millimeter resolution coronary magnetic resonance angiography with non-rigid motion-compensated PROST
Source: Springer Nature journal article supplement (doi:10.1186/s12968-020-00611-5), 2020-01-01

## VD-CASPR sampling

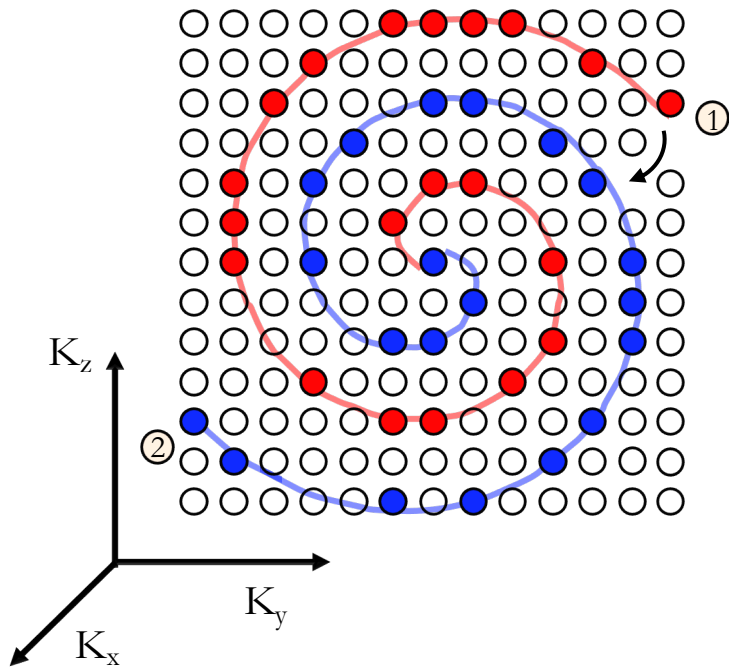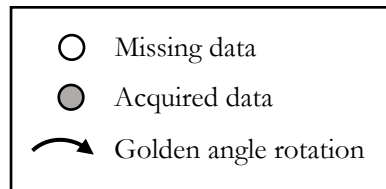

Supplement: MOESM1 [file 17902534]
