# Supplementary material for: 3D whole-heart isotropic sub-millimeter resolution coronary magnetic resonance angiography with non-rigid motion-compensated PROST
Source: Springer Nature journal article supplement (doi:10.1186/s12968-020-00611-5), 2020-01-01

Patient 7 – 35 yo 57 bpm

Patient 6 – 53 yo 51 bpm

Patient 8 – 54 yo 57 bpm

TC-PROST

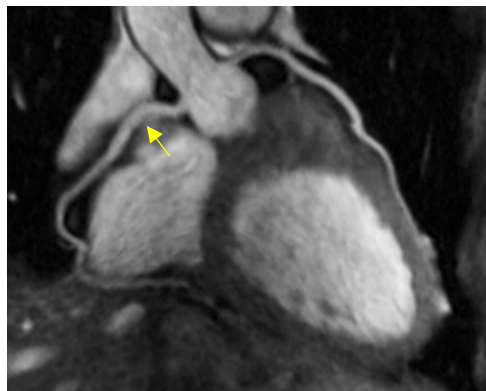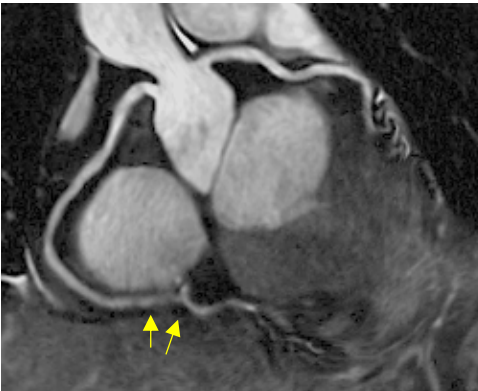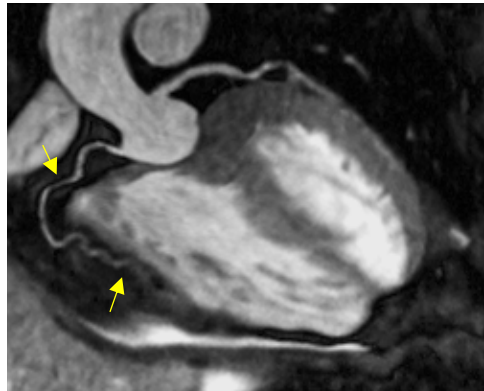

NR-PROST

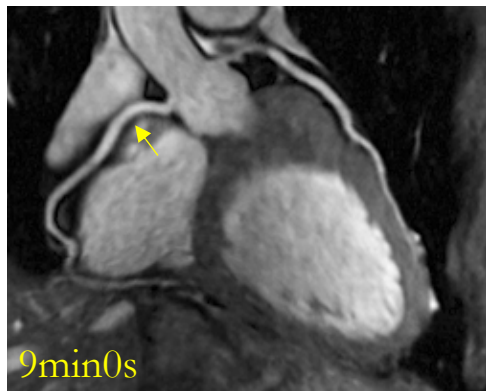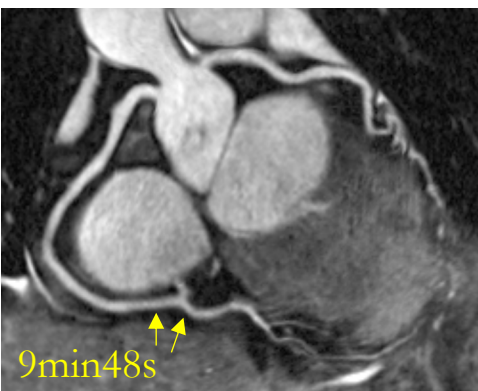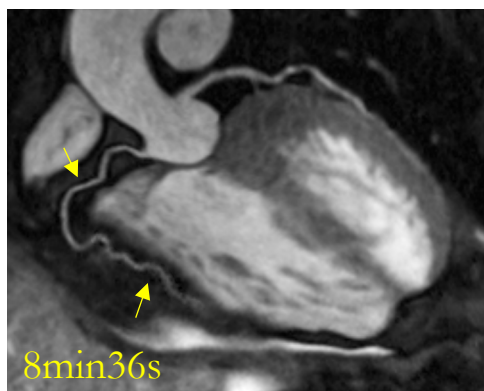

Supplement: MOESM5 [file 17902534]
